# Supplementary material for: A β-carotene-binding protein carrying a red pigment regulates body-color transition between green and black in locusts
Source: eLife. 2019 Jan 8;8:e41362. doi: 10.7554/eLife.41362 (PMC6324882; doi:10.7554/eLife.41362)
Supplement: Figure 1—source data 1. [file elife-41362-fig1-data1.xlsx]

## Sheet: Sheet1
			Sample name
Fig.1C		Gregarious locust			Solitary locust		Values of N	Statistical method	P value		F	df	homoscedasticity
		Average	SE		Average	SE
	Apolipoprotein D (Ap)	9.2621	1.1823		0.7723	0.2376	N=6	Student’s t-test	0.000514318	***	3.788	10	0.099
	Alcohol dehydrogenase	7.0412	0.9796		1.7024	0.3188	N=6	Student’s t-test	0.000821429	***	1.936	10	0.192
	Dopamine N-acetyltransferase (DNa)	6.4112	2.0599		0.3887	0.5229	N=6	Student’s t-test	0.000572187	***	4.767	10	0.082
	β-carotene binding protein (βCBP)	11.1882	0.5189		0.9722	0.0398	N=6	Student’s t-test	0.000321781	***	3.218	10	0.181
	Juvenile hormone acid methyltransferase (JHAM)	5.5001	1.8932		0.1409	0.0225	N=6	Student’s t-test	0.000819241	***	4.428	10	0.079
	Phenoloxidase (Ph)	17.8812	0.7812		1.5496	0.4671	N=6	Student’s t-test	0.000315362	***	3.813	10	0.151
	Fatty acid-binding protein	3.6992	0.4661		1.4412	0.1251	N=6	Student’s t-test	0.00821642	**	0.215	10	0.573
	Laccase-2	2.1511	0.2469		1.0982	0.1933	N=6	Student’s t-test	0.0316149	*	0.095	10	0.689
	Chitinase3-like protein	2.0215	0.4499		0.7314	0.1126	N=6	Student’s t-test	0.0353368	*	0.363	10	0.559
	Cuticle protein 18.7 (Cp)	0.9517	0.1326		10.0329	0.6842	N=6	Student’s t-test	0.000523145	***	2.816	10	0.181
	Phenylalanine hydroxylase (Phh)	6.8256	1.452		27.5732	3.2543	N=6	Student’s t-test	0.000229217	***	0.182	10	0.671
	GTP cyclohydrolase I	3.3723	0.3189		7.1954	0.5253	N=6	Student’s t-test	0.00719417	**	1.399	10	0.287
	Endocuticle structural protein SgAbd-6	2.5009	0.0636		5.3118	0.3173	N=6	Student’s t-test	0.00824161	**	1.754	10	0.243
	Cuticle protein 9	2.0877	0.7301		12.488	0.3452	N=6	Student’s t-test	0.000593182	***	0.818	10	0.396
	Probable chitinase 3	1.9688	0.1201		4.6216	0.1721	N=6	Student’s t-test	0.00821934	**	0.079	10	0.781
	Cuticle protein 7	7.2781	1.0211		6.7921	1.4531	N=6	Student’s t-test	0.943214	n.s.	0.293	10	0.623
	Cuticle protein A2B	13.3732	1.8399		19.5321	0.6321	N=6	Student’s t-test	0.621744	n.s.	1.433	10	0.292
