# Supplementary material for: A β-carotene-binding protein carrying a red pigment regulates body-color transition between green and black in locusts
Source: eLife. 2019 Jan 8;8:e41362. doi: 10.7554/eLife.41362 (PMC6324882; doi:10.7554/eLife.41362)
Supplement: Figure 2—source data 1. [file elife-41362-fig2-data1.xlsx]

## Sheet: Sheet1
	Sample name	Average	SE	Values of N	Statistical method	P value		F	SS	df	homoscedasticity
Fig.2A
	G-pron	1.02533	0.09123	N=4	One-way ANOVA		a	129.241	3.132	5	0.081
	G-Tho	0.21538	0.02032	N=4			b
	G-Abd	0.25324	0.05972	N=4			b
	S-pron	0.05469	0.03293	N=4			c
	S-Tho	0.02873	0.00398	N=4			c
	S-Abd	0.02937	0.00466	N=4			c
Fig.2B
	G2st	5.4547	2.21758	N=4	One-way ANOVA		c	6.18	31998.2	5	0.054
	G3nd	13.9178	1.78829	N=4			b
	G4th	105.658	33.4255	N=4			a
	S2st	1.0944	0.44454	N=4			e
	S3nd	7.67	0.89151	N=4			d
	S4th	0.1543	0.0615	N=4			e
Fig.2C
	G	2.52351	0.24398	N=4	One-way ANOVA		a	24.869	33.035	3	0.071
	S	0.1943	0.07749	N=4			b
	IG	0.0019	0.00048	N=4			b
	CS	2.8328	0.5091	N=4			a
Fig.2D	G	1.40005	0.1863	N=3	One-way ANOVA		a	13.638	3.07	3	0.138
	S	0.12676	0.0594109	N=3			c
	IG	0.596463	0.111875	N=3			b
	CS	1.45556	0.22202	N=3			a
Fig.2G	G	15.7753*1012	0.80898*1012	N=3	One-way ANOVA		a	65.765	408.7*1024	3	0.079
	S	0.4045*1012	0.05632*1012	N=3			c
	IG	1.9213*1012	0.3034*1012	N=3			b
	CS	4.0449*1012	1.2135*1012	N=3			b
Fig.2H	S	40.4583	6.52807	N=6	Student’s t-test	1.90059e-05	***	2.559		10	0.148
	G	110.871	4.36081	N=6
