# Supplementary material for: A β-carotene-binding protein carrying a red pigment regulates body-color transition between green and black in locusts
Source: eLife. 2019 Jan 8;8:e41362. doi: 10.7554/eLife.41362 (PMC6324882; doi:10.7554/eLife.41362)
Supplement: Figure 3—source data 1. [file elife-41362-fig3-data1.xlsx]

## Sheet: Sheet1
	Sample name	Average	SE	Values of N	Statistical method	P value		F	df	homoscedasticity
Fig.3A	dsGFP	1.3808	0.3059	N=6	Student’s t-test	0.00296668	**	11.767	10	0.093
	dsCBP	0.0013	0.00094	N=6
Fig.3B	CK	0.5129	0.07754	N=6	Student’s t-test	0.00570665	**	26.135	10	0.086
	carotene	5.3611	1.21551	N=6
Fig.3C	dsGFP	1.29619	0.271136	N=3	Student’s t-test	0.00840642	**	3.51	4	0.124
	dsCBP	0.197388	0.0878034	N=3
Fig.3D	CK	0.640995	0.162512	N=3	Student’s t-test	0.00238658	**	0.818	4	0.396
	carotene	1.73002	0.0895724	N=3
Fig.3F	dsGFP	12.8*1012	0.55652*1012	N=3	Student’s t-test	2.31453e-05	***	4.579	4	0.099
	dsCBP	2.43478*1012	0.04173*1012	N=3
Fig.3G	CK	0.29677*1012	0.012903*1012	N=3	Student’s t-test	7.65476e-05	***	2.241	4	0.209
	carotene	6.726638*1012	0.823529*1012	N=3
Fig.3H	G-dsGFP	103.654	4.0826	N=6	Student’s t-test	0.0355689	*	1.403	10	0.264
	G-dsCBP	73.7964	10.2763	N=6
	S-CK	31.9219	2.09481	N=6	Student’s t-test	1.38386e-05	***	1.843	10	0.223
	S-carotene	106.338	12.4206	N=6
