# Supplementary material for: A β-carotene-binding protein carrying a red pigment regulates body-color transition between green and black in locusts
Source: eLife. 2019 Jan 8;8:e41362. doi: 10.7554/eLife.41362 (PMC6324882; doi:10.7554/eLife.41362)
Supplement: Figure 5—source data 1. [file elife-41362-fig5-data1.xlsx]

## Sheet: Sheet1
	Sample name	Average	SE	Values of N	Statistical method	P value		F	df	homoscedasticity
Fig.5F	G	61.9048	6.34921	N=3	Student’s t-test	0.00547643	**	2.955	4	0.161
	S	3.1746	0.253968	N=3
Fig.5G	G-Control	36.5079	1.42857	N=3	Student’s t-test	0.00789066	**	3.43	4	0.138
	G-RNAi βCBP	2.69841	1.5873	N=3
Fig.5H	S-Control	2.53968	0.47619	N=3	Student’s t-test	0.00345623	**	2.82	4	0.168
	S-Feeding β-carotene	35.4556	2.38095	N=3
