# Supplementary material for: A β-carotene-binding protein carrying a red pigment regulates body-color transition between green and black in locusts
Source: eLife. 2019 Jan 8;8:e41362. doi: 10.7554/eLife.41362 (PMC6324882; doi:10.7554/eLife.41362)
Supplement: Supplementary file 1. [file elife-41362-supp1.xlsx]

## Sheet: Sheet1
Supplementary files 1. The gene-stability measure (M) values of three reference genes in different stage of gregarious and solitary locustsas as calculated by geNorm algorithms.
Genes	GAPDH	18S	β-actin
M	0.631	0.488	0.264
