# Supplementary material for: A β-carotene-binding protein carrying a red pigment regulates body-color transition between green and black in locusts
Source: eLife. 2019 Jan 8;8:e41362. doi: 10.7554/eLife.41362 (PMC6324882; doi:10.7554/eLife.41362)
Supplement: Supplementary file 2. [file elife-41362-supp2.xlsx]

## Sheet: Sheet1
Supplementary files 2. Primers used in the qPCR analysis and RNA interference
Purpose	*Primer sequence (5'-3')
qPCR of β-carotene binding protein	QF: GGTGGAGAAGTGGCTGGCTCAG
	QR: GGGAAGACCGCCCTGTAGAAGC
qPCR of apolipoprotein D	QF:TGGGCAAGTGGTACGAGCAGGAG
	QR: CCCGCTAATCTCGCTGTGCCTTT
qPCR of alcohol dehydrogenase	QF: CAGGGCATCGCTGTCGGCGCTG
	QR: CGCGCCCGGCCCGAGTCCACCT
qPCR of dopamine N-acetyltransferase	QF: CGTCGATGTTCAGGTGGCA
	QR: TCTTCTGGAAGCCCAAGTGC
qPCR of juvenile hormone acid methyltransferase	QF: TAGATGATTTGTGTATTCGC
	QR: AAAAGGTGGCATTAGAATAT
qPCR of phenoloxidase	QF: GGCTTCCCTGCTGAGTTCTT
	QR: TCCGGGTACATACGGTTGTG
qPCR of fatty acid-binding protein	QF: AAACAGTTCTCGGGCAAGAAGTA
	QR: CGTCATCTTGTTGCCGAGTATTTT
qPCR of laccase-2	QF: TGTCGGGTGTCGCATTTATC
	QR: ATGAGGCGGAAGCGGTAG
qPCR of chitinase 3-like protein	QF: CCTTCAACTGCAGCCTCTTCT
	QR:TGTCTGGATGATTTGCTAGGAGTG
qPCR of cuticle protein 18.7	QF: CCTTACACGAGGCATCACAA
	QR: CTGCCACGACCTTCAACAT
qPCR of phenylalanine hydroxylase	QF: GCGTACAACTACAAACATGGTGAA
	QR: AGTTGTGGAATGTTATCCTCACGA
qPCR of GTP cyclohydrolase I	QF: TTGTCGAAGGAGTGCATAT
	QR: TCTCTGAAGACTCCAAGCA
qPCR of endocuticle structural protein SgAbd-6	QF: GACTCGTCTGCTGCTCAGCCCA
	QR: TGGCGGATCAGGCCGTCGCTC
qPCR of cuticle protein 9	QF: ATACCATCCAATGATCGACTACGG
	QR: CTGAGCAGGTTGACCAGGTAG
qPCR of probable chitinase 3	QF: CAAGTACCTGGAGCTGGAGAG
	QR: CGTAGTCCACATATCTGGTGATGT
qPCR of cuticle protein 7	QF: GCTCCACCGCCACCAAACAAACA
	QR: CGCGTCTCGTGCTGCGCCTTCTG
qPCR of cuticle protein A2B	QF:GTGGTGGGCAAAGTGGTGGCCGC
	QR: CAGACGCCACTGTGGCCACGCC
qPCR of biliverdin-binding protein	QF: GGTCGAGCATTTCCAAGT
	QR: CCACAGCACAGGCAACTA
qPCR of carotenoid-binding protein	QF: CGGCAACGGTTACTTCAATC
	QR: GCTGAGTTCATAGTGCGATTTT
qPCR of β-actin	QF: AATTACCATTGGTAACGAGCGATT
	QR: TGCTTCCATACCCAGGAATGA
qPCR of GAPDH	QF:GGCAGTTAATGACCCGTTCA
	QR:ACAACAAGACTGTCGCCATC
qPCR of 18S	QF:ATGCAAACAGAGTCCCGACCAGA
	QR:GCGCAGAACCTACCATCGACAG
RNAi of β-carotene binding protein	dsF: CCTCACCTGGAACTCCAACTC
	dsR: ATAGTAAGTCTGGCCCAACTGC
RNAi of GFP	dsF: CACAAGTTCAGCGTGTCCG
	dsR: GTTCACCTTGATGCCGTTC
* F: forward primer; R: reverse primer.
