# Supplementary material for: A β-carotene-binding protein carrying a red pigment regulates body-color transition between green and black in locusts
Source: eLife. 2019 Jan 8;8:e41362. doi: 10.7554/eLife.41362 (PMC6324882; doi:10.7554/eLife.41362)
Supplement: Supplementary file 3. [file elife-41362-supp3.xlsx]

## Sheet: Sheet1
Supplementary files 3. Composition of the basic synthetic diet
Substances	content	unit
Cholesterol	50	mg
Linoleic acid	0.2	ml
β-carotene	25	mg
Salt mixture	1.5	g
Sucrose	5	g
White dextrin	5	g
Casein	6	g
Cellulose powder	15	g
Bacteriological peptone	2	g
Egg albumen powder	2	g
Ascorbic acid	100	mg
Vitamins in 10 ml of 20% ethanol:
thiamin	25	ug/g of diet
ribofiavin	25	ug/g of diet
nicotinic acid	100	ug/g of diet
pyridoxine	25	ug/g of diet
calcium pantothenate	50	ug/g of diet
meso-inositol	250	ug/g of diet
folic acid	25	ug/g of diet
p-aminobenzoic acid	25	ug/g of diet
choline chloride	1250	ug/g of diet
